# Supplementary material for: Semaphorin-7A promotes macrophage-mediated mammary epithelial and ductal carcinoma in situ invasion
Source: Research Square preprint supplement (doi:10.21203/rs.3.rs-6448305/v1), 2025-05-15

Western Blots and Gel Images

**Figure 5: SEMA7A promotes protease and cytokine expression in RAW264.7 macrophages through β1-integrin/AKT/GSK3β/β-catenin signaling pathway**

**
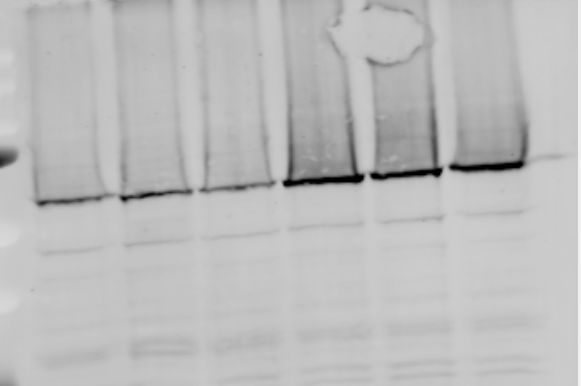
**pAKT

GAPDH (pAKT)


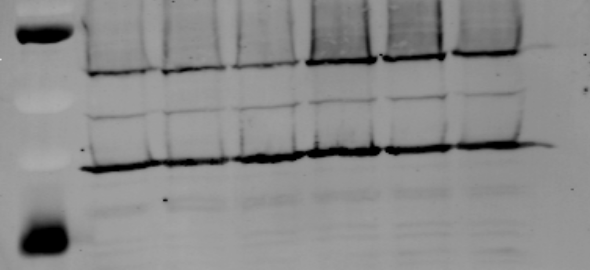


AKT


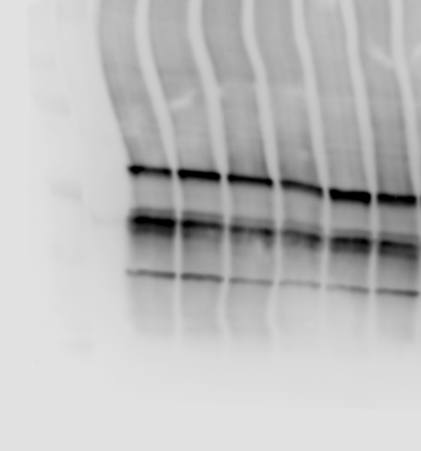


GAPDH (AKT)


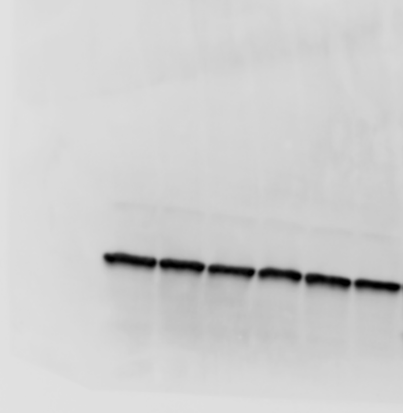


pGSK3β


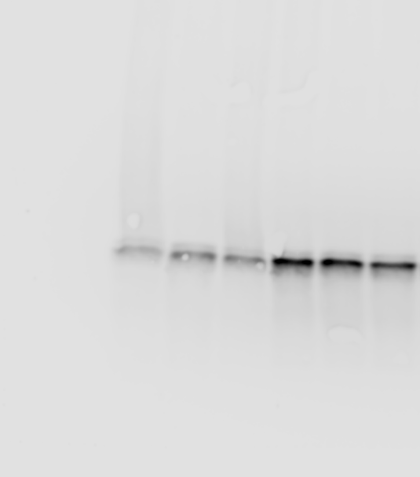


GAPDH (pGSK3β)


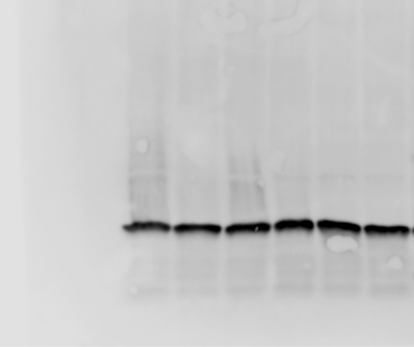


GSK3β


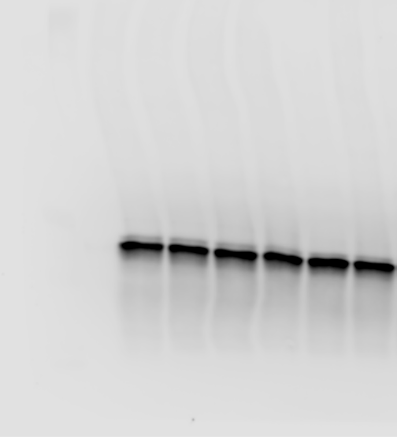


GAPDH (GSK3β)


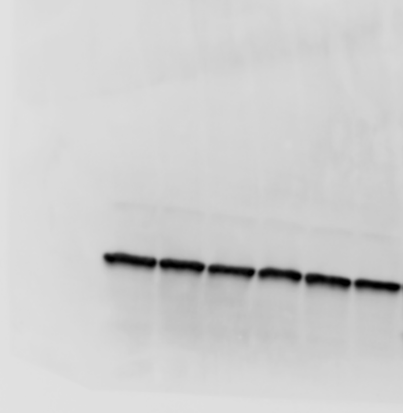


MMP Zymography


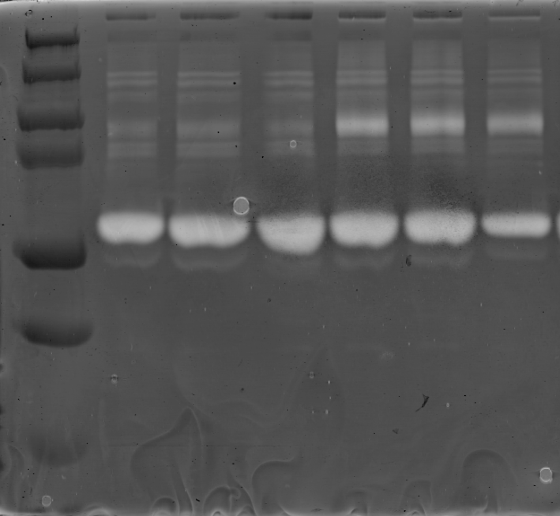


**Supplement Figure 6:**

pAKT


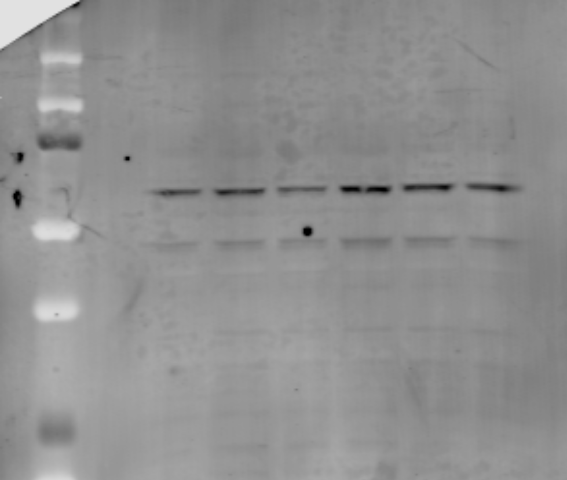


GAPDH (pAKT)


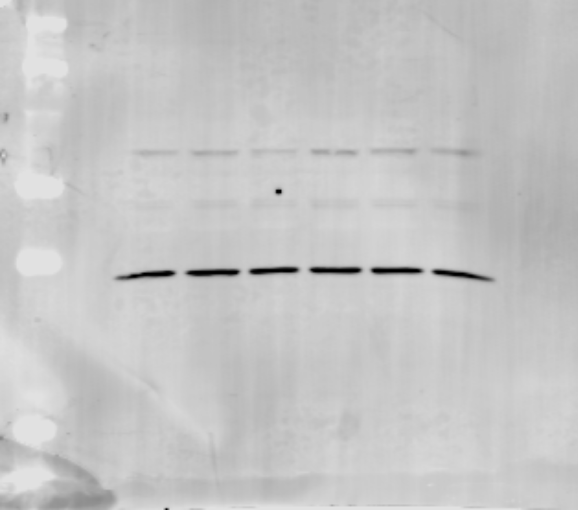


AKT


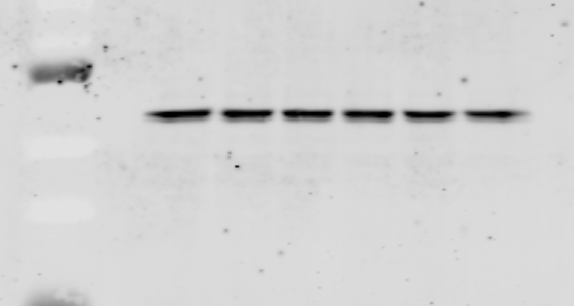


GAPDH (AKT)


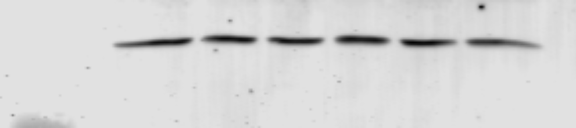


pGSK3β


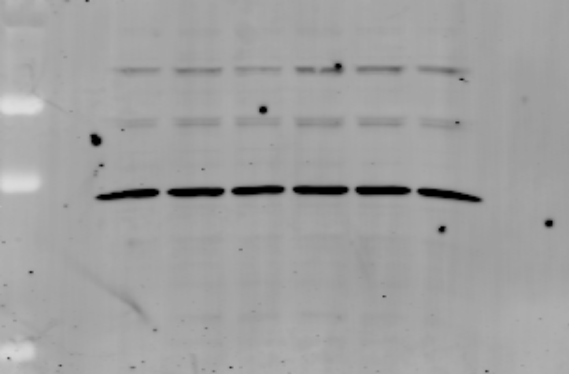


GAPDH (pGSK3β)


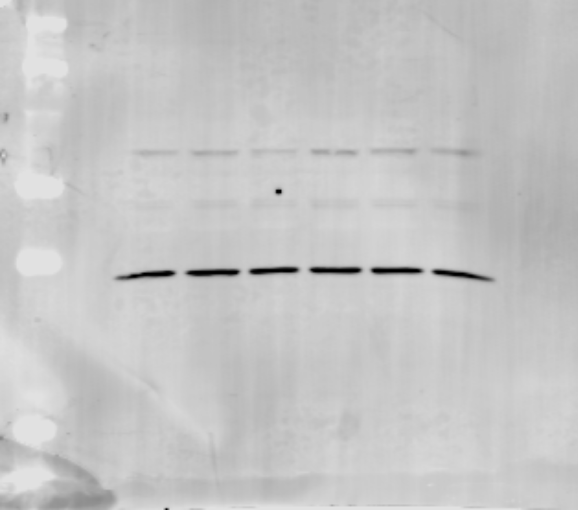


GSK3β


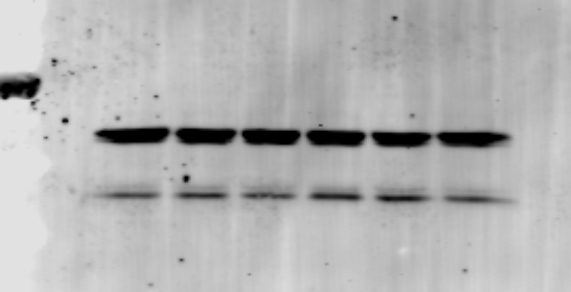


GAPDH (GSK3β)


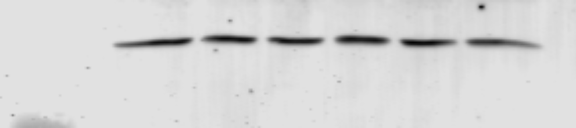


MMP Zymography


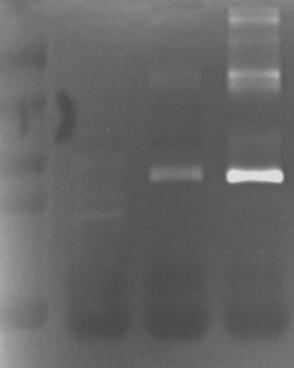

Supplement: Supplementary file 1 [file e6d073f7c076376119c39abb.docx]
